# Supplementary material for: A cation-selective and anion-controlled benzothiazolyl-attached macrocycle for NLO-based cation detection: variational first hyperpolarizabilities
Source: Royal Society of Chemistry journal article supplement (doi:10.1039/c8nj00360b), 2018-01-01
Supplement: c8nj00360b1.pdf [file c8nj00360b1.pdf]

**Cation-Selective and Anion-Controlled Benzothiazolyl-Attached  
Macrocyclic as NLO-based Cation Detection: Variational First  
Hyperpolarizabilities**

Jinting Ye <sup>a</sup>, Li Wang <sup>a</sup>, Hongqiang Wang <sup>a</sup>, Xiumei Pan <sup>a, b</sup>, Haiming Xie <sup>a, b</sup>, and  
Yongqing Qiu <sup>a, b, \*</sup>

<sup>a</sup> Institute of Functional Material Chemistry, Faculty of Chemistry, Northeast Normal University, Changchun, 130024, China

<sup>b</sup> National & Local United Engineering Laboratory for Power Battery, Faculty of Chemistry, Northeast Normal University, Changchun, 130024, China

---

\* Corresponding Author. Fax: +86 431 85098768.  
E-mail addresses: [qiuyq466@nenu.edu.cn](mailto:qiuyq466@nenu.edu.cn) (Y. Q. Qiu).

The electronic density variation between the excited  $\rho_{ES}(r)$  and ground states  $\rho_{GS}(r)$  are defined as follows:

$$\Delta\rho(r) = \rho_{ES}(r) - \rho_{GS}(r) \quad (1)$$

Subsequently, the function is divided into two categories representing an increase ( $\rho_+$ ) or a decrease ( $\rho_-$ ) of the density in space resulting from the electronic transition.

Hence the  $q^{CT}$  is given as:

$$q^{CT} = \int \rho_+(r)dr = \int \rho_-(r)dr \quad (2)$$

The density distribution barycenters ( $r_+$  and  $r_-$ ), giving the starting and ending points of transfer, corresponding to  $\rho_+$  and  $\rho_-$  are defined by:

$$\begin{aligned} r_+ &= (x_+, y_+, z_+) = \frac{1}{q^{CT}} \int r \rho_+(r) dr \\ r_- &= (x_-, y_-, z_-) = \frac{1}{q^{CT}} \int r \rho_-(r) dr \end{aligned} \quad (3)$$

And  $d^{CT}$  is thus defined as the distance separating between the two points ( $r_+$  and  $r_-$ ), which is an important factor to evaluate the CT length.

$$d^{CT} = |r_+ - r_-| \quad (4)$$

Eventually, an index  $H$  is defined as half of the sum of centroids axis (x axis) along the molecular structure direction.

$$H = \frac{\sigma_{+x} + \sigma_{-x}}{2} \quad (5)$$

If  $H \cong d^{CT}$ , there is a significant overlap between the centroids along this axis.

Finally, the  $t$  index is proposed to evaluate the degree of separation between  $\rho_+(r)$  and  $\rho_-(r)$  regions.

$$t = d^{CT} - H \quad (6)$$

Large  $t$  value indicates less overlap between the regions with an increment or a depletion of the density.

**Table S1.** Individual components of first hyperpolarizabilities and total first hyperpolarizabilities ( $10^{-30}$  esu) of **L** and **L\*M** complexes computed at various levels of theory in acetonitrile solution.

| Complex                  | Functionals    | $\beta_x$ | $\beta_y$ | $\beta_z$ | $\beta_{\text{tot}}$ | $\beta_{\text{tot}}(\mathbf{L})/\beta_{\text{tot}}(\mathbf{L}^*\mathbf{M})$ |
|--------------------------|----------------|-----------|-----------|-----------|----------------------|-----------------------------------------------------------------------------|
| <b>L</b>                 | CAM-B3LYP      | 125.7     | -3.7      | 0.6       | 125.8                | -                                                                           |
|                          | $\omega$ B97XD | 116.1     | -3.1      | 1.0       | 116.1                | -                                                                           |
|                          | M06-2X         | 133.5     | -3.8      | 0.5       | 133.5                | -                                                                           |
| <b>L*Na<sup>+</sup></b>  | CAM-B3LYP      | 97.8      | 1.0       | 6.0       | 98.0                 | 1.3                                                                         |
|                          | $\omega$ B97XD | 90.7      | 1.5       | 6.4       | 91.0                 | 1.3                                                                         |
|                          | M06-2X         | 102.7     | 1.2       | 6.2       | 102.9                | 1.3                                                                         |
| <b>L*K<sup>+</sup></b>   | CAM-B3LYP      | 102.2     | 0.7       | 7.3       | 102.4                | 1.2                                                                         |
|                          | $\omega$ B97XD | 94.6      | 1.2       | 7.5       | 95.0                 | 1.2                                                                         |
|                          | M06-2X         | 107.5     | 0.8       | 7.5       | 107.8                | 1.2                                                                         |
| <b>L*Mg<sup>2+</sup></b> | CAM-B3LYP      | 49.0      | -2.8      | -1.6      | 49.1                 | 2.6                                                                         |
|                          | $\omega$ B97XD | 46.1      | -2.3      | -0.9      | 46.1                 | 2.5                                                                         |
|                          | M06-2X         | 48.9      | -2.5      | -2.2      | 49.0                 | 2.7                                                                         |
| <b>L*Ca<sup>2+</sup></b> | CAM-B3LYP      | 77.6      | 0.9       | 5.4       | 77.8                 | 1.6                                                                         |
|                          | $\omega$ B97XD | 72.6      | 1.6       | 5.5       | 72.9                 | 1.6                                                                         |
|                          | M06-2X         | 81.0      | 0.9       | 4.9       | 81.2                 | 1.6                                                                         |
| <b>L*Zn<sup>2+</sup></b> | CAM-B3LYP      | 46.5      | -3.9      | -3.6      | 46.8                 | 2.7                                                                         |
|                          | $\omega$ B97XD | 43.6      | -3.3      | -2.9      | 43.8                 | 2.7                                                                         |
|                          | M06-2X         | 47.7      | -3.4      | -3.0      | 48.0                 | 2.8                                                                         |
| <b>L*Cd<sup>2+</sup></b> | CAM-B3LYP      | 58.9      | -3.7      | 1.9       | 59.0                 | 2.1                                                                         |
|                          | $\omega$ B97XD | 54.8      | -3.0      | 2.5       | 54.9                 | 2.1                                                                         |
|                          | M06-2X         | 60.9      | -3.4      | 2.3       | 61.0                 | 2.2                                                                         |
| <b>L*Hg<sup>2+</sup></b> | CAM-B3LYP      | -2.6      | 6.4       | -4.5      | 8.2                  | 15.3                                                                        |
|                          | $\omega$ B97XD | -3.9      | 7.6       | -5.4      | 10.1                 | 11.5                                                                        |
|                          | M06-2X         | -3.0      | 6.7       | -4.4      | 8.6                  | 15.5                                                                        |

|                                           |           |       |      |      |       |     |
|-------------------------------------------|-----------|-------|------|------|-------|-----|
| <b>Hg(L)(Cl)<sub>2</sub></b>              | CAM-B3LYP | 119.5 | -2.0 | 12.1 | 120.1 | 1.0 |
|                                           | ωB97XD    | 110.9 | -0.5 | 12.0 | 115.7 | 1.0 |
|                                           | M06-2X    | 125.1 | -0.9 | 11.1 | 125.6 | 1.1 |
| <b>Hg(L)(ClO<sub>4</sub>)<sub>2</sub></b> | CAM-B3LYP | 38.0  | 2.0  | 5.7  | 38.6  | 3.3 |
|                                           | ωB97XD    | 34.3  | 2.4  | 6.0  | 34.9  | 3.3 |
|                                           | M06-2X    | 37.5  | 1.5  | 5.2  | 37.9  | 3.5 |

---

**Table S2.** The  $\beta_{\text{HRS}}$ ,  $\beta_{\text{J}}$  and  $\Phi(\beta_{\text{J}})$  values, as well as  $\rho$  and DR of complexes **L** and **L\*M** calculated at the  $\omega\text{B97XD}/6\text{-311+G(d,p)}/\text{SDD}$  level in acetonitrile, using wavelengths of 1064, 1340, 1460, 1907 nm and in the static limit ( $\lambda=\infty$ ).

| Complex                  | $\beta_{\text{HRS}}$ | DR   | $ \beta_{\text{J}=1} $ | $ \beta_{\text{J}=3} $ | $\rho$ | $\Phi(\beta_{\text{J}=1})$ | $\Phi(\beta_{\text{J}=3})$ |
|--------------------------|----------------------|------|------------------------|------------------------|--------|----------------------------|----------------------------|
| $\lambda=1064\text{nm}$  |                      |      |                        |                        |        |                            |                            |
| <b>L</b>                 | 62.7                 | 4.8  | 115.8                  | 100.1                  | 0.87   | 0.54                       | 0.46                       |
| <b>L*Na<sup>+</sup></b>  | 51.3                 | 4.8  | 94.4                   | 82.3                   | 0.87   | 0.53                       | 0.47                       |
| <b>L*K<sup>+</sup></b>   | 53.6                 | 4.7  | 98.7                   | 86.3                   | 0.87   | 0.53                       | 0.47                       |
| <b>L*Mg<sup>2+</sup></b> | 27.7                 | 4.46 | 50.0                   | 47.2                   | 0.94   | 0.51                       | 0.49                       |
| <b>L*Ca<sup>2+</sup></b> | 41.7                 | 4.7  | 76.4                   | 68.0                   | 0.89   | 0.53                       | 0.47                       |
| <b>L*Zn<sup>2+</sup></b> | 27.0                 | 4.4  | 48.6                   | 46.4                   | 0.95   | 0.51                       | 0.49                       |
| <b>L*Cd<sup>2+</sup></b> | 33.6                 | 4.5  | 61.0                   | 56.4                   | 0.92   | 0.52                       | 0.48                       |
| <b>L*Hg<sup>2+</sup></b> | 2.5                  | 2.6  | 3.4                    | 6.3                    | 1.85   | 0.35                       | 0.65                       |
| $\lambda=1340\text{nm}$  |                      |      |                        |                        |        |                            |                            |
| <b>L</b>                 | 47.8                 | 4.7  | 87.9                   | 77.3                   | 0.88   | 0.53                       | 0.47                       |
| <b>L*Na<sup>+</sup></b>  | 39.8                 | 4.7  | 73.0                   | 64.5                   | 0.88   | 0.53                       | 0.47                       |
| <b>L*K<sup>+</sup></b>   | 41.5                 | 4.7  | 76.1                   | 75.6                   | 0.89   | 0.53                       | 0.47                       |
| <b>L*Mg<sup>2+</sup></b> | 21.8                 | 4.4  | 39.0                   | 37.9                   | 0.97   | 0.51                       | 0.49                       |
| <b>L*Ca<sup>2+</sup></b> | 32.6                 | 4.6  | 59.5                   | 53.9                   | 0.91   | 0.52                       | 0.48                       |
| <b>L*Zn<sup>2+</sup></b> | 21.1                 | 4.3  | 37.7                   | 37.0                   | 0.98   | 0.50                       | 0.50                       |
| <b>L*Cd<sup>2+</sup></b> | 26.2                 | 4.5  | 47.3                   | 44.7                   | 0.94   | 0.51                       | 0.49                       |
| <b>L*Hg<sup>2+</sup></b> | 2.3                  | 2.6  | 3.1                    | 5.7                    | 1.86   | 0.35                       | 0.65                       |
| $\lambda=1460\text{nm}$  |                      |      |                        |                        |        |                            |                            |
| <b>L</b>                 | 44.8                 | 4.7  | 82.3                   | 72.6                   | 0.88   | 0.53                       | 0.47                       |
| <b>L*Na<sup>+</sup></b>  | 37.4                 | 4.7  | 68.6                   | 60.9                   | 0.89   | 0.53                       | 0.47                       |
| <b>L*K<sup>+</sup></b>   | 39.0                 | 4.7  | 71.4                   | 63.7                   | 0.89   | 0.53                       | 0.47                       |
| <b>L*Mg<sup>2+</sup></b> | 20.5                 | 4.3  | 36.7                   | 35.8                   | 0.98   | 0.51                       | 0.49                       |
| <b>L*Ca<sup>2+</sup></b> | 30.7                 | 4.6  | 55.9                   | 55.9                   | 0.91   | 0.52                       | 0.48                       |
| <b>L*Zn<sup>2+</sup></b> | 19.9                 | 4.3  | 35.5                   | 35.0                   | 0.99   | 0.50                       | 0.50                       |
| <b>L*Cd<sup>2+</sup></b> | 24.7                 | 4.4  | 44.4                   | 42.2                   | 0.51   | 0.49                       | 0.51                       |
| <b>L*Hg<sup>2+</sup></b> | 2.2                  | 2.6  | 3.0                    | 5.6                    | 1.87   | 0.34                       | 0.66                       |
| $\lambda=1907\text{nm}$  |                      |      |                        |                        |        |                            |                            |
| <b>L</b>                 | 39.1                 | 4.7  | 71.6                   | 63.8                   | 0.89   | 0.53                       | 0.47                       |
| <b>L*Na<sup>+</sup></b>  | 32.9                 | 4.7  | 60.1                   | 53.8                   | 0.89   | 0.53                       | 0.47                       |
| <b>L*K<sup>+</sup></b>   | 34.2                 | 4.6  | 62.5                   | 56.3                   | 0.90   | 0.53                       | 0.47                       |
| <b>L*Mg<sup>2+</sup></b> | 18.1                 | 4.3  | 32.2                   | 32.0                   | 0.99   | 0.50                       | 0.50                       |

|                          |      |     |                  |      |      |      |      |
|--------------------------|------|-----|------------------|------|------|------|------|
| <b>L*Ca<sup>2+</sup></b> | 27.1 | 4.6 | 49.2             | 45.2 | 0.92 | 0.52 | 0.48 |
| <b>L*Zn<sup>2+</sup></b> | 17.5 | 4.3 | 31.1             | 31.2 | 1.0  | 0.50 | 0.50 |
| <b>L*Cd<sup>2+</sup></b> | 21.7 | 4.4 | 38.9             | 37.5 | 0.96 | 0.51 | 0.49 |
| <b>L*Hg<sup>2+</sup></b> | 2.1  | 0.6 | 2.8              | 5.3  | 1.89 | 0.35 | 0.65 |
|                          |      |     | $\lambda=\infty$ |      |      |      |      |
| <b>L</b>                 | 49.7 | 4.5 | 89.9             | 84.1 | 0.94 | 0.52 | 0.48 |
| <b>L*Na<sup>+</sup></b>  | 39.2 | 4.4 | 70.4             | 67.8 | 0.96 | 0.50 | 0.50 |
| <b>L*K<sup>+</sup></b>   | 41.0 | 4.4 | 73.6             | 71.0 | 0.97 | 0.51 | 0.49 |
| <b>L*Mg<sup>2+</sup></b> | 21.1 | 3.8 | 35.7             | 41.0 | 1.15 | 0.47 | 0.53 |
| <b>L*Ca<sup>2+</sup></b> | 31.9 | 4.2 | 56.4             | 56.9 | 1.00 | 0.50 | 0.50 |
| <b>L*Zn<sup>2+</sup></b> | 20.3 | 3.7 | 33.9             | 40.4 | 1.19 | 0.46 | 0.54 |
| <b>L*Cd<sup>2+</sup></b> | 24.9 | 3.9 | 42.5             | 48.0 | 1.12 | 0.47 | 0.53 |
| <b>L*Hg<sup>2+</sup></b> | 4.9  | 3.3 | 7.8              | 9.7  | 1.34 | 0.42 | 0.58 |

---

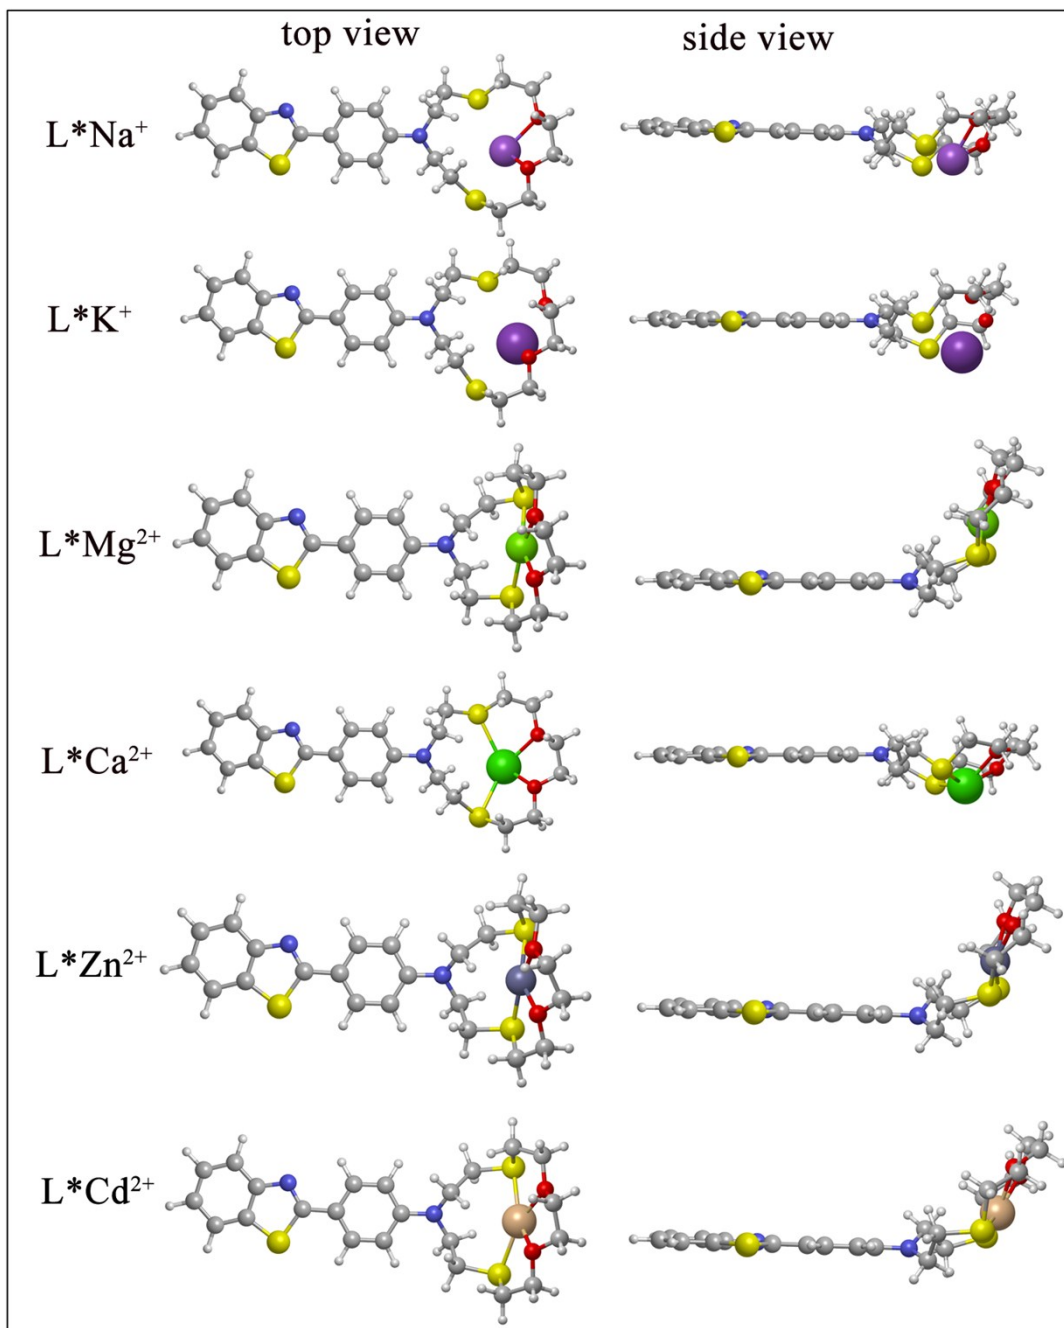

**Figure S1.** Optimized structures of  $L^*M$  ( $M = Na^+, K^+, Mg^{2+}, Ca^{2+}, Zn^{2+},$  and  $Cd^{2+}$ ).
